# Supplementary material for: Temporal trend analysis of avoidable mortality in Taiwan, 1971-2008: overall progress, with areas for further medical or public health investment
Source: PubMed Central journal article supplement (PMC3744173; doi:10.1186/1471-2458-13-551), 2013-06-06
Supplement: 1471-2458-13-551-S3.pdf [file 1471-2458-13-551-S3.pdf]

Additional file 3: Avoidable mortality (SEYLL rate per 100000 people), males.

| Cause               | Year    |         |         |         |         |         |         |         |
|---------------------|---------|---------|---------|---------|---------|---------|---------|---------|
|                     | 1971    | 1972    | 1973    | 1974    | 1975    | 1976    | 1977    | 1978    |
| All causes          | 23147.3 | 21287.9 | 21946.9 | 21401.3 | 20945.0 | 20297.7 | 20415.5 | 19758.8 |
| Injuries            | 3933.7  | 3920.1  | 3989.7  | 4117.8  | 4227.4  | 4091.4  | 4386.8  | 4540.3  |
| IHD                 | 767.4   | 791.7   | 888.3   | 863.2   | 920.0   | 941.4   | 979.4   | 983.5   |
| Lung cancer         | 269.2   | 307.5   | 326.3   | 332.5   | 334.8   | 312.6   | 362.7   | 404.1   |
| Hypertension        | 7586.2  | 7268.1  | 7556.6  | 7402.1  | 7286.5  | 7275.6  | 7433.8  | 7494.0  |
| Ulcers              | 442.9   | 435.7   | 393.4   | 415.2   | 302.8   | 270.4   | 258.0   | 214.2   |
| Hodgkin's disease   | 7.4     | 11.0    | 7.2     | 10.9    | 9.6     | 9.4     | 7.7     | 8.9     |
| Asthma              | 321.1   | 259.2   | 229.9   | 203.7   | 148.0   | 115.3   | 97.6    | 74.7    |
| Gallbladder disease | 35.8    | 29.7    | 35.4    | 26.5    | 24.9    | 26.7    | 28.9    | 27.2    |
| Tuberculosis        | 1478.3  | 1373.9  | 1264.1  | 1196.2  | 1019.8  | 924.6   | 845.4   | 762.0   |
| Hernia              | 15.2    | 11.2    | 12.0    | 6.8     | 9.3     | 7.6     | 9.2     | 6.8     |
| Appendicitis        | 21.2    | 10.3    | 9.3     | 13.8    | 10.2    | 13.1    | 5.4     | 8.1     |
| Cause               | 1979    | 1980    | 1981    | 1982    | 1983    | 1984    | 1985    | 1986    |
| All causes          | 19517.6 | 19215.7 | 18943.5 | 18253.6 | 18110.8 | 17304.2 | 16867.1 | 16693.6 |
| Injuries            | 4711.6  | 4651.6  | 4762.3  | 4497.8  | 4385.4  | 4391.0  | 4220.2  | 4385.5  |
| IHD                 | 1008.2  | 1260.1  | 1048.5  | 1170.9  | 1265.9  | 1118.8  | 1033.8  | 1306.5  |
| Lung cancer         | 384.3   | 424.2   | 443.0   | 455.8   | 463.8   | 474.1   | 492.8   | 485.4   |
| Hypertension        | 7144.5  | 6857.5  | 6824.4  | 6706.8  | 6804.8  | 6293.9  | 5922.5  | 5730.4  |
| Ulcers              | 202.8   | 187.2   | 189.8   | 167.2   | 173.2   | 171.5   | 136.1   | 117.3   |
| Hodgkin's disease   | 9.0     | 5.8     | 6.0     | 5.2     | 8.3     | 5.8     | 3.6     | 5.8     |
| Asthma              | 65.9    | 56.1    | 53.7    | 42.2    | 41.6    | 34.6    | 30.1    | 34.1    |
| Gallbladder disease | 24.7    | 22.9    | 19.2    | 17.3    | 22.2    | 19.7    | 16.0    | 16.8    |
| Tuberculosis        | 697.0   | 608.7   | 605.5   | 538.6   | 482.8   | 438.5   | 404.8   | 340.4   |
| Hernia              | 6.0     | 3.9     | 3.8     | 3.7     | 3.2     | 4.5     | 4.6     | 4.2     |
| Appendicitis        | 5.0     | 9.8     | 8.6     | 4.6     | 7.7     | 6.5     | 3.6     | 3.6     |

Additional file 1: Avoidable mortality (SEYLL rate per 100000 people), males, continued

| Cause               | Year    |         |         |         |         |         |         |         |
|---------------------|---------|---------|---------|---------|---------|---------|---------|---------|
|                     | 1987    | 1988    | 1989    | 1990    | 1991    | 1992    | 1993    | 1994    |
| All causes          | 16222.2 | 14401.2 | 15593.7 | 14863.3 | 14102.3 | 13869.9 | 13527.1 | 13502.4 |
| Injuries            | 4486.8  | 4584.5  | 4643.9  | 4375.3  | 4232.7  | 3976.7  | 3929.2  | 3952.1  |
| IHD                 | 1434.5  | 988.3   | 1055.2  | 1091.0  | 1115.7  | 1270.8  | 1185.5  | 1083.5  |
| Lung cancer         | 480.4   | 427.0   | 481.1   | 447.1   | 448.6   | 458.3   | 433.2   | 466.8   |
| Hypertension        | 5029.8  | 3783.1  | 4130.2  | 3815.5  | 3441.2  | 3297.2  | 2984.0  | 2866.7  |
| Ulcers              | 96.1    | 73.7    | 101.2   | 91.1    | 76.2    | 70.0    | 76.5    | 63.6    |
| Hodgkin's disease   | 2.4     | 2.5     | 2.0     | 3.2     | 3.1     | 1.4     | 2.7     | 1.7     |
| Asthma              | 32.4    | 33.3    | 28.7    | 30.9    | 35.8    | 32.1    | 34.9    | 37.9    |
| Gallbladder disease | 18.7    | 13.2    | 13.8    | 10.9    | 14.9    | 15.6    | 13.0    | 16.9    |
| Tuberculosis        | 312.2   | 251.2   | 286.8   | 257.5   | 226.9   | 204.8   | 171.4   | 168.5   |
| Hernia              | 1.3     | 2.0     | 0.9     | 2.4     | 1.7     | 0.6     | 2.1     | 1.0     |
| Appendicitis        | 6.4     | 1.9     | 1.9     | 3.9     | 1.4     | 1.4     | 1.8     | 1.5     |
| Cause               | 1995    | 1996    | 1997    | 1998    | 1999    | 2000    | 2001    | 2002    |
| All causes          | 13589.6 | 13390.7 | 12902.2 | 12594.3 | 12390.1 | 11944.4 | 12878.5 | 12260.9 |
| Injuries            | 3807.1  | 3714.9  | 3369.2  | 3263.3  | 3378.2  | 2944.0  | 2915.6  | 2689.3  |
| IHD                 | 1003.5  | 1049.0  | 991.2   | 970.1   | 962.8   | 921.6   | 1144.5  | 1090.1  |
| Lung cancer         | 480.6   | 497.3   | 504.6   | 475.0   | 483.3   | 465.0   | 580.2   | 582.6   |
| Hypertension        | 2889.4  | 2706.4  | 2480.8  | 2330.7  | 2083.0  | 2125.2  | 2422.8  | 2239.7  |
| Ulcers              | 64.6    | 65.8    | 66.5    | 61.4    | 53.0    | 57.3    | 52.7    | 48.0    |
| Hodgkin's disease   | 2.3     | 3.4     | 2.1     | 2.7     | 2.8     | 2.9     | 2.3     | 3.6     |
| Asthma              | 38.9    | 29.4    | 28.0    | 38.0    | 22.4    | 16.4    | 27.3    | 27.2    |
| Gallbladder disease | 9.4     | 12.0    | 9.7     | 10.8    | 14.3    | 10.4    | 13.3    | 13.4    |
| Tuberculosis        | 157.7   | 142.6   | 145.9   | 133.4   | 120.7   | 123.5   | 118.1   | 103.9   |
| Hernia              | 1.0     | 1.0     | 1.1     | 0.2     | 1.4     | 0.1     | 1.6     | 0.5     |
| Appendicitis        | 0.8     | 0.7     | 2.6     | 1.1     | 1.3     | 0.8     | 0.6     | 2.2     |

Additional file 1: Avoidable mortality (SEYLL rate per 100000 people), males, continued

| Cause               | Year    |         |         |         |         |         |
|---------------------|---------|---------|---------|---------|---------|---------|
|                     | 2003    | 2004    | 2005    | 2006    | 2007    | 2008    |
| All causes          | 12023.9 | 12076.0 | 12301.9 | 11858.3 | 11467.3 | 11261.8 |
| Injuries            | 2562.8  | 2637.0  | 2769.5  | 2672.3  | 2267.9  | 2194.0  |
| IHD                 | 1096.2  | 1227.8  | 1090.0  | 1031.8  | 989.9   | 989.8   |
| Lung cancer         | 564.2   | 541.5   | 544.8   | 544.6   | 562.5   | 555.7   |
| Hypertension        | 2184.1  | 2138.0  | 2155.0  | 2040.5  | 1954.9  | 1920.8  |
| Ulcers              | 46.5    | 48.0    | 47.3    | 39.1    | 38.6    | 35.8    |
| Hodgkin's disease   | 3.9     | 3.7     | 5.1     | 1.9     | 2.6     | 2.3     |
| Asthma              | 25.8    | 24.1    | 32.1    | 26.7    | 24.0    | 19.4    |
| Gallbladder disease | 11.4    | 13.6    | 10.4    | 13.1    | 9.5     | 12.6    |
| Tuberculosis        | 105.1   | 73.1    | 66.9    | 54.1    | 54.5    | 39.9    |
| Hernia              | 0.5     | 0.6     | 0.6     | 0.1     | 0.9     | 0.2     |
| Appendicitis        | 1.3     | 1.5     | 1.3     | 1.2     | 0.5     | 1.6     |
