# Supplementary material for: Temporal trend analysis of avoidable mortality in Taiwan, 1971-2008: overall progress, with areas for further medical or public health investment
Source: PubMed Central journal article supplement (PMC3744173; doi:10.1186/1471-2458-13-551), 2013-06-06
Supplement: 1471-2458-13-551-S4.pdf [file 1471-2458-13-551-S4.pdf]

Additional file 4: Avoidable mortality (SEYLL rate per 100000 people), females.

| Cause               | Year    |         |         |         |         |         |         |         |
|---------------------|---------|---------|---------|---------|---------|---------|---------|---------|
|                     | 1971    | 1972    | 1973    | 1974    | 1975    | 1976    | 1977    | 1978    |
| All causes          | 24081.1 | 22531.2 | 22346.3 | 21524.1 | 20657.3 | 20004.0 | 19583.2 | 18503.1 |
| Injuries            | 1823.6  | 1819.0  | 1917.7  | 1846.7  | 1886.4  | 1818.7  | 1895.0  | 2083.2  |
| Breast cancer       | 263.5   | 323.3   | 281.8   | 275.3   | 278.2   | 279.7   | 325.5   | 301.0   |
| Lung cancer         | 249.7   | 207.5   | 223.3   | 233.9   | 251.0   | 232.7   | 256.5   | 289.9   |
| IHD                 | 841.2   | 793.5   | 904.5   | 904.2   | 1005.7  | 1063.6  | 1071.3  | 1126.6  |
| Hypertension        | 9774.5  | 10109.1 | 10094.1 | 9965.8  | 9491.2  | 9633.7  | 9606.0  | 9506.8  |
| Cervical cancer     | 296.0   | 304.8   | 292.2   | 275.7   | 295.4   | 305.5   | 307.6   | 319.8   |
| Hodgkin's disease   | 6.0     | 9.0     | 2.9     | 1.9     | 7.6     | 3.8     | 3.0     | 1.7     |
| Ulcers              | 322.1   | 279.2   | 299.0   | 286.5   | 235.0   | 187.0   | 177.0   | 161.7   |
| Asthma              | 392.3   | 412.1   | 342.0   | 302.3   | 212.2   | 173.6   | 142.9   | 106.5   |
| Gallbladder disease | 65.4    | 48.5    | 52.4    | 43.4    | 48.7    | 48.0    | 51.6    | 45.6    |
| Maternal mortality  | 134.6   | 108.7   | 119.8   | 91.9    | 67.3    | 89.0    | 77.9    | 61.6    |
| Tuberculosis        | 1020.8  | 906.1   | 810.1   | 733.0   | 582.9   | 545.5   | 482.8   | 413.9   |
| Hernia              | 5.0     | 0.8     | 2.5     | 0.7     | 5.4     | 5.5     | 2.8     | 4.4     |
| Uterine cancer      | 390.6   | 317.3   | 380.0   | 363.6   | 329.5   | 312.5   | 353.8   | 290.9   |
| Appendicitis        | 24.5    | 20.8    | 14.1    | 18.8    | 18.3    | 15.1    | 11.7    | 9.5     |

Additional file 2: Avoidable mortality (SEYLL rate per 100000 people), females, continued

| Cause               | Year    |         |         |         |         |         |         |         |
|---------------------|---------|---------|---------|---------|---------|---------|---------|---------|
|                     | 1979    | 1980    | 1981    | 1982    | 1983    | 1984    | 1985    | 1986    |
| All causes          | 17876.2 | 17502.3 | 17128.2 | 16244.9 | 15857.5 | 14719.3 | 14336.3 | 13864.0 |
| Injuries            | 2116.3  | 2124.7  | 2131.6  | 2055.4  | 2047.7  | 1932.7  | 1917.8  | 2003.8  |
| Breast cancer       | 356.1   | 317.5   | 320.0   | 311.5   | 345.7   | 336.1   | 360.8   | 364.1   |
| Lung cancer         | 247.3   | 293.1   | 299.4   | 305.9   | 300.7   | 277.9   | 294.0   | 314.1   |
| IHD                 | 1079.7  | 1127.6  | 1086.9  | 1189.0  | 1163.6  | 969.1   | 933.1   | 1167.7  |
| Hypertension        | 8868.2  | 8559.6  | 8797.7  | 8176.7  | 7883.1  | 7403.3  | 6891.2  | 6364.1  |
| Cervical cancer     | 309.9   | 332.9   | 279.4   | 310.1   | 308.5   | 301.4   | 337.6   | 305.8   |
| Hodgkin's disease   | 4.4     | 5.6     | 4.4     | 1.9     | 5.7     | 2.1     | 1.4     | 2.2     |
| Ulcers              | 154.3   | 130.8   | 133.6   | 117.9   | 129.7   | 113.3   | 96.7    | 76.7    |
| Asthma              | 86.1    | 61.4    | 66.3    | 42.0    | 45.6    | 37.3    | 37.0    | 43.6    |
| Gallbladder disease | 45.7    | 35.7    | 30.4    | 26.3    | 27.6    | 31.4    | 26.6    | 19.1    |
| Maternal mortality  | 44.4    | 46.9    | 46.1    | 43.6    | 36.7    | 27.3    | 18.1    | 14.4    |
| Tuberculosis        | 344.6   | 323.1   | 300.4   | 267.8   | 236.1   | 204.0   | 166.1   | 155.4   |
| Hernia              | 1.1     | 2.7     | 2.8     | 3.6     | 2.4     | 1.4     | 0.7     | 1.0     |
| Uterine cancer      | 268.6   | 260.7   | 244.3   | 256.3   | 200.8   | 198.1   | 195.5   | 157.0   |
| Appendicitis        | 10.8    | 10.5    | 7.2     | 9.4     | 9.3     | 6.1     | 2.9     | 3.5     |

Additional file 2: Avoidable mortality (SEYLL rate per 100000 people), females, continued

| Cause               | Year    |        |         |         |        |        |        |        |
|---------------------|---------|--------|---------|---------|--------|--------|--------|--------|
|                     | 1987    | 1988   | 1989    | 1990    | 1991   | 1992   | 1993   | 1994   |
| All causes          | 12977.6 | 9418.1 | 11719.4 | 10815.9 | 9942.6 | 9398.0 | 8907.1 | 8401.7 |
| Injuries            | 2007.2  | 1837.4 | 2015.7  | 1899.5  | 1799.5 | 1686.0 | 1693.4 | 1641.5 |
| Breast cancer       | 354.4   | 356.0  | 414.4   | 410.9   | 421.2  | 410.2  | 458.2  | 456.7  |
| Lung cancer         | 302.9   | 270.0  | 284.8   | 263.9   | 277.8  | 257.2  | 257.2  | 269.6  |
| IHD                 | 1243.1  | 608.1  | 859.7   | 852.9   | 790.2  | 844.0  | 691.3  | 588.0  |
| Hypertension        | 5679.7  | 3274.9 | 4339.8  | 3725.3  | 3126.1 | 2762.0 | 2342.3 | 2088.4 |
| Cervical cancer     | 294.3   | 261.9  | 289.5   | 297.8   | 288.0  | 294.1  | 288.4  | 289.9  |
| Hodgkin's disease   | 2.0     | 3.5    | 2.5     | 1.6     | 1.2    | 1.7    | 0.6    | 2.6    |
| Ulcers              | 58.9    | 35.8   | 46.5    | 51.5    | 37.5   | 37.1   | 31.4   | 27.8   |
| Asthma              | 36.0    | 27.0   | 32.1    | 28.1    | 22.7   | 24.8   | 29.1   | 24.4   |
| Gallbladder disease | 17.6    | 11.9   | 16.1    | 16.6    | 17.2   | 16.0   | 14.1   | 12.4   |
| Maternal mortality  | 14.1    | 14.1   | 19.5    | 19.6    | 11.8   | 10.1   | 13.0   | 11.4   |
| Tuberculosis        | 138.8   | 93.4   | 95.5    | 95.7    | 84.4   | 75.5   | 65.1   | 47.4   |
| Hernia              | 1.1     | 0.7    | 0.9     | 0.0     | 0.8    | 0.4    | 0.6    | 0.0    |
| Uterine cancer      | 147.2   | 120.5  | 93.6    | 70.9    | 61.4   | 67.9   | 55.0   | 63.8   |
| Appendicitis        | 4.1     | 1.8    | 1.1     | 2.1     | 2.9    | 1.2    | 1.7    | 0.6    |

Additional file 2: Avoidable mortality (SEYLL rate per 100000 people), females, continued

| Cause               | Year   |        |        |        |        |        |        |        |
|---------------------|--------|--------|--------|--------|--------|--------|--------|--------|
|                     | 1995   | 1996   | 1997   | 1998   | 1999   | 2000   | 2001   | 2002   |
| All causes          | 8477.2 | 8356.2 | 7848.0 | 7514.6 | 7607.4 | 7108.3 | 7486.9 | 7158.9 |
| Injuries            | 1640.0 | 1507.5 | 1397.9 | 1407.8 | 1724.6 | 1284.1 | 1203.7 | 1145.7 |
| Breast cancer       | 505.0  | 527.0  | 543.2  | 496.6  | 511.3  | 533.6  | 660.0  | 609.0  |
| Lung cancer         | 288.1  | 309.1  | 309.7  | 288.8  | 265.4  | 287.6  | 357.5  | 372.5  |
| IHD                 | 536.9  | 526.1  | 481.7  | 436.1  | 436.6  | 386.0  | 505.3  | 486.9  |
| Hypertension        | 2005.2 | 1858.6 | 1585.2 | 1505.2 | 1305.0 | 1274.2 | 1567.3 | 1375.5 |
| Cervical cancer     | 301.7  | 282.6  | 276.4  | 267.3  | 252.2  | 243.2  | 269.4  | 255.2  |
| Hodgkin's disease   | 1.2    | 2.4    | 2.1    | 0.8    | 1.4    | 1.4    | 2.0    | 0.6    |
| Ulcers              | 23.1   | 27.0   | 19.5   | 18.4   | 24.0   | 19.8   | 27.9   | 25.5   |
| Asthma              | 26.0   | 23.0   | 20.3   | 23.5   | 29.3   | 18.4   | 21.7   | 24.0   |
| Gallbladder disease | 11.8   | 6.5    | 6.6    | 6.5    | 9.6    | 8.2    | 13.3   | 9.6    |
| Maternal mortality  | 11.0   | 11.1   | 14.0   | 10.5   | 10.4   | 10.3   | 7.6    | 8.6    |
| Tuberculosis        | 41.2   | 58.1   | 48.8   | 41.2   | 39.0   | 33.9   | 40.8   | 30.5   |
| Hernia              | 0.2    | 0.7    | 0.3    | 0.1    | 0.1    | 0.4    | 0.2    | 0.0    |
| Uterine cancer      | 50.1   | 39.1   | 31.9   | 44.5   | 42.1   | 38.3   | 45.2   | 44.7   |
| Appendicitis        | 0.2    | 0.5    | 0.6    | 1.9    | 0.5    | 2.2    | 1.8    | 1.0    |

Additional file 2: Avoidable mortality (SEYLL rate per 100000 people), females, continued

| Cause               | Year   |        |        |        |        |        |
|---------------------|--------|--------|--------|--------|--------|--------|
|                     | 2003   | 2004   | 2005   | 2006   | 2007   | 2008   |
| All causes          | 7027.6 | 6810.7 | 6719.8 | 6273.0 | 6144.0 | 5929.5 |
| Injuries            | 1123.4 | 1070.3 | 1147.5 | 1076.2 | 969.5  | 901.8  |
| Breast cancer       | 667.4  | 631.0  | 640.5  | 621.3  | 632.7  | 659.3  |
| Lung cancer         | 354.6  | 345.6  | 323.1  | 331.2  | 346.4  | 342.5  |
| IHD                 | 458.7  | 479.4  | 428.9  | 435.2  | 376.1  | 379.9  |
| Hypertension        | 1363.2 | 1226.8 | 1192.3 | 1044.9 | 992.1  | 966.3  |
| Cervical cancer     | 236.1  | 222.5  | 198.2  | 176.4  | 172.2  | 161.6  |
| Hodgkin's disease   | 1.5    | 1.2    | 2.6    | 1.2    | 1.9    | 0.1    |
| Ulcers              | 21.9   | 20.5   | 15.5   | 20.5   | 16.2   | 11.6   |
| Asthma              | 17.3   | 14.3   | 14.5   | 12.1   | 13.9   | 13.5   |
| Gallbladder disease | 7.6    | 10.9   | 7.7    | 8.8    | 8.9    | 10.0   |
| Maternal mortality  | 6.2    | 4.7    | 6.5    | 6.2    | 5.9    | 5.8    |
| Tuberculosis        | 31.5   | 23.0   | 17.4   | 16.7   | 12.5   | 12.5   |
| Hernia              | 0.4    | 0.2    | 0.8    | 0.1    | 0.1    | 0.0    |
| Uterine cancer      | 49.8   | 52.3   | 62.2   | 57.9   | 52.9   | 64.9   |
| Appendicitis        | 1.0    | 1.5    | 0.5    | 0.8    | 1.2    | 1.2    |
